# Supplementary material for: Genetic diversity and organic waste degrading capacity of Hermetia illucens from the evergreen forest of the Equatorial Choco lowland
Source: PeerJ. 2023 Feb 3;11:e14798. doi: 10.7717/peerj.14798 (PMC9901308; doi:10.7717/peerj.14798)
Supplement: Data S1 [file peerj-11-14798-s001.xlsx]

## Sheet: Rawdata
Treatment	Repetition	Nº of larvae in the sample	Biomass/Larval weigh (10 larvae)
Control	1	24	0.179
	2	26	0.283
	3	25	0.372
5% PS	1	26	0.29
	2	28	0.235
	3	26	0.268
5% PE	1	21	0.121
	2	21	0.257
	3	14	0.192
5% PLA	1	26	0.324
	2	27	0.384
	3	30	0.468
